# Supplementary material
Source: HighWire-hosted journal article supplement (http://www.cmajopen.ca/highwire/filestream/80755/field_highwire_adjunct_files/2/open-2013-0070-original-submission.pdf)
Supplement: open-2013-0070-original-submission.pdf [file open-2013-0070-original-submission.pdf]

1  
2 **Willingness to use different types of information technology among patients with**  
3 **chronic non-communicable disease**  
4  
5  
6

7 Arash Efteshami Afshar. Faculty of Medicine, University of Alberta  
8

9 Rob Weaver. Faculty of Public Health Sciences, University of Calgary  
10

11 Meng Lin. Faculty of Medicine, University of Alberta  
12

13 G. Michael Allan. Faculty of Family Medicine, University of Alberta  
14

15 Paul Ronksley. Community Health Sciences, University of Calgary  
16

17 Claudia Sanmartin. Statistics Canada  
18

19 Richard Lewanczuk. Faculty of Medicine, University of Alberta  
20

21 Mark Rosenberg. Faculty of Arts, Queens University.  
22

23 Braden Manns. Faculty of Medicine, University of Calgary  
24

25 Brenda Hemmelgarn. Faculty of Medicine, University of Calgary  
26

27 Marcello Tonelli. Faculty of Medicine, University of Alberta  
28

29 for the Interdisciplinary Chronic Disease Collaboration  
30  
31  
32  
33  
34  
35

36 **Correspondence to:** [celloadm@ualberta.ca](mailto:celloadm@ualberta.ca)  
37  
38  
39

40 **Word count:** 2650  
41  
42  
43  
44  
45  
46  
47  
48  
49  
50  
51  
52  
53  
54  
55  
56  
57  
58  
59  
60

## Abstract

**Background:** There is considerable interest in using information technologies such as email, text messages (SMS) and videoconferencing to facilitate management of non-communicable chronic diseases (NCDs) such as hypertension, diabetes, and vascular disease. Whether these technologies are available and appealing to the target population is unknown.

**Methods:** We analyzed data from a computer-assisted telephone survey conducted by Statistics Canada in February and March 2012 of 1,849 adults living in four western Canadian provinces and with at least one chronic disease. Survey respondents were asked about their capacity (e.g. “Do you own a mobile phone?”) and willingness to use each of the three information technologies to interact with health care providers. For all analyses, Statistics Canada’s calibrated design weights and bootstrap weights were used to obtain population-level point estimates for proportions and odds ratios (ORs).

**Results:** 1849 of 2316 eligible persons participated (80%). Of the 1849 participants, 82% had hypertension, 26% had diabetes, 21% had heart disease and 8% had stroke; 32% had more than one chronic disease. A high proportion of respondents (76.4%; 73.3-79.3%) owned a computer with internet access or a mobile phone and a slightly lower proportion (66.3%; 63.0-69.5%) were interested in using email to interact with a specialist. Respondents were less enthusiastic about SMS than email since only 44.9% (41.2-48.7%) were interested in the former. Enthusiasm for information technology was more pronounced among those residing further from medical specialists than in those living closer. Among respondents who were potentially interested in videoconferencing, almost 50% of remote dwellers would use videoconferencing if it could save more than 60 minutes of travel time.

**Conclusions:** A substantial proportion of people with chronic disease were interested in using electronic technologies to help manage their chronic disease – especially videoconference- and email-based methods. The effectiveness and cost-implications of videoconferencing and email for management of NCDs deserves further consideration.

**Background:**

Management of non-communicable chronic diseases (NCDs) such as hypertension, diabetes, and vascular disease is a major challenge facing health services worldwide.<sup>1</sup> Although most patients with NCDs can be managed by primary care physicians, a substantial proportion require referral to specialist physicians, who generally practice in major urban centers. Given Canada's large size and low population density, an additional barrier for optimal NCD management for some patients is the so-called geographic barrier posed by the often-considerable distances to specialist physicians – which may be magnified in people with reduced capacity or willingness to travel.<sup>2,3</sup>

To facilitate self-management and ameliorate geographic barriers, there has been considerable interest in using electronic technologies such as email, text messages (short message service; SMS) and videoconferencing to facilitate NCD management.<sup>4-6</sup> Email could be used to send messages from provider to patient or vice versa; in theory it might improve patients' access to providers or reduce provider response time (especially for non-urgent issues). Text messages are  $\leq 140$  characters in length and are usually received by mobile phones. Because of their brevity, they are best suited to reminders directed to the patient (for example, to take medication) or motivational messages (for example, "Did you go for a walk today?"), although they could also be used to send brief queries from patient to provider. Videoconferencing can be used instead of face-to-face encounters between provider and patient and allows real-time, private interactions between the participants -- using specialized professional equipment or alternatively consumer grade components (such as Skype running on a personal computer).

These information technologies have been promoted as a potential solution to the geographic barriers faced by many Canadians with NCDs, as well as a method that could be used to promote ongoing NCD self-management regardless of residence location.<sup>7</sup> However, the utility of such technologies depends on their availability and appeal to the target population. Since many Canadian NCD patients are older and of lower socioeconomic status<sup>8</sup> (both factors that might reduce willingness and capacity to use information technologies),<sup>9,10</sup> the extent to which these criteria are met is uncertain. We used data from a large sample of Western Canadians with chronic disease to examine their capacity and willingness to use information technologies to facilitate health care service delivery, focusing on hypothetical

1  
2 interactions with a relevant medical specialist. We hypothesized that the majority of survey  
3 participants would be interested in using one or more information technologies to help  
4 manage their NCDs, and would have access to the necessary equipment. We also  
5 hypothesized that interest in these technologies would be greater among those residing  
6 further from specialist medical services.  
7  
8  
9  
10

## 11 **Methods**

### 12 *Data sources*

13  
14 We analyzed data from the 2012 *Barriers to Care for People with Chronic Health Conditions*  
15 survey (BCPCHC). The BCPCHC survey included data from adults aged 40 or older residing  
16 in the four western Canadian provinces who responded to the 2011 *Canadian Community*  
17 *Health Survey* (CCHS) and who reported that they had been diagnosed by a health  
18 professional as having diabetes, heart disease, hypertension or prior stroke. Members of the  
19 Canadian Forces, First Nations people living on reserves, and people in institutions were  
20 ineligible for inclusion in the CCHS. Computer-assisted telephone interviews were conducted  
21 by Statistics Canada in February and March 2012, and of the 2,316 individuals selected for  
22 inclusion for the BCPCHC, 1,849 (80%) completed the survey. With permission, the  
23 responses of these individuals were linked to their 2011 CCHS responses, which provided  
24 additional demographic and lifestyle information. The purpose of the survey was to elicit the  
25 perspectives of respondents about the current quality of their chronic disease care, including  
26 potential barriers and facilitators. The current manuscript presents results related to the use of  
27 information technologies.  
28  
29  
30  
31  
32  
33  
34  
35  
36  
37  
38  
39  
40  
41  
42

### 43 *Capacity and willingness to use information technologies*

44 Survey respondents were asked about their capacity (e.g. "Do you own a mobile phone?")  
45 and willingness to use each of the three information technologies (email, SMS,  
46 videoconferencing) to interact with health care providers. Those who had the capacity but  
47 were unwilling were asked open-ended questions to explore the reasons for their  
48 unwillingness. Using a hypothetical scenario, participants were also asked how many minutes  
49 a videoconference encounter would have to save them before they would be willing to use  
50 such an encounter to replace a face-to-face physician visit.  
51  
52  
53  
54  
55  
56  
57  
58  
59  
60

### *Proximity to specialist care*

We classified residence location based on whether or not the respondent resided in the same city (census metropolitan area) as the closest relevant medical specialist's practice (e.g. cardiologist, endocrinologist, nephrologist, general internist), using residential postal codes to define the residence location of respondents. Respondents with a relevant medical specialist in the same metropolitan area were considered to reside "in close proximity" to such specialists; other participants were considered to reside "further" from specialists.

### *Other variables*

We categorized respondents by their chronic disease(s) and by whether they reported being diagnosed with one vs. more than one of the four chronic diseases ("multimorbidity"). We obtained the sociodemographic and health characteristics presented in Table 1 from the CCHS. We calculated BMI category from self-reported weight and height, using an adjustment for self-reported data.<sup>11</sup>

### *Analysis*

We did all analyses using STATA 11.0 ([www.stata.com](http://www.stata.com)). The baseline characteristics of the survey respondents were tabulated and compared across residence location. The proportion of respondents reporting on key variables of interest was compared using design-based F tests. The reasons that respondents provided regarding why they were/were not interested in using the different technologies were also explored and illustrated.

We used logistic regression modeling to examine the association between sociodemographic factors and outcomes of interest (capacity and willingness to use the electronic technologies). The models were adjusted for characteristics as described in the behavioral model of health service utilizations<sup>12</sup> and the motivational model,<sup>13</sup> which are frameworks for factors that may be associated with interest in electronic technologies. These variables are categorized into baseline characteristics, current quality of health care and attitude toward new technologies. In addition, we also investigated respondents' attitudes towards how much time would have to be saved in order to use videoconferencing for a specialist visit (i.e., < 30 minutes, 31-60 minutes, > 60 minutes or don't know) compared to an in-person visit with a specialist.

1  
2 For all analyses, Statistics Canada's calibrated design weights and bootstrap weights were  
3 used to obtain population-level point estimates for proportions or odds ratios (ORs) and  
4 bootstrapping was used to determine 95% confidence intervals (CIs) for the estimates.  
5  
6 Following Statistics Canada guidelines, if the coefficient of variation (CV) was 16% to 33.3%,  
7 the results were interpreted with caution as they may be unreliable. If the CV was >33.3%, the  
8 results were considered unreliable and were not presented. Ethics approval was provided by  
9 the Conjoint Health Research Ethics Board of the University of Calgary and the Health  
10 Research Ethics Board of the University of Alberta.  
11  
12  
13  
14  
15  
16  
17

## 18 **Results**

19 The majority of the 1849 respondents were white (87%) and married or in common-law  
20 relationships (67%). A substantial proportion of respondents were obese (30.8%) and 70%  
21 were current or former smokers. The greatest number of respondents were from British  
22 Columbia (45%), followed by Alberta (32%), Manitoba (13%) and Saskatchewan (11%). Most  
23 of the respondents were post-secondary and/or university graduates (60%) and half were  
24 between the ages of 40-64 years (49%).  
25  
26  
27  
28  
29  
30  
31

32 Overall, 1514 (82%) of respondents had hypertension, 486 (26%) had diabetes, 396 (21%)  
33 had heart disease and 147 (8%) had stroke; 596 (32%) had more than one chronic disease.  
34 Despite having at least one chronic disease, 77% of respondents reported their health as  
35 'good' or better. Other health related characteristics of the respondents are shown in Table 1.  
36 Less than 1% of respondents had used one of the information technologies to access health  
37 care in the last 12 months.  
38  
39  
40  
41  
42  
43  
44

45 The majority of respondents (76.4%; 73.3-79.3%) owned a computer with internet access or a  
46 mobile phone and 66.3% (63.0-69.5%) were interested in using email to interact with a  
47 specialist (Table 2). However, respondents were less enthusiastic about text messaging than  
48 about email since only 44.9% (41.2-48.7%) were interested in using the former. There was  
49 considerable interest in using videoconferencing to interact with physicians, which was less  
50 pronounced for visits with primary care (50.4%; 46.4-54.4%) than specialized care (65.1%;  
51 61.4-68.6%) – perhaps because respondents perceive fewer barriers to interacting with  
52  
53  
54  
55  
56  
57  
58  
59  
60

1  
2 primary care physicians. As expected, enthusiasm for information technology was more  
3 pronounced among those residing further from (vs closer to) medical specialists.  
4  
5

6  
7 The most common reasons given by respondents for why they would be unwilling to  
8 correspond with a provider by email or text message are shown in Figure 1 and in  
9 Supplementary Table 1.  
10  
11

12  
13  
14 Based on hypothetical scenarios, those residing further from specialists stated that they would  
15 need to save more time before they were willing to visit a videoconferencing centre to replace  
16 a face-to-face visit with a specialist (as compared with those living in close proximity to a  
17 specialist, Table 2). Among the respondents who were potentially interested in  
18 videoconferencing, almost 50% of those residing further from a specialist would use  
19 videoconferencing if it could save more than 60 minutes of their time. However, approximately  
20 one third of respondents who were potentially interested in videoconferencing would use a  
21 videoconference visit in preference to a face-to-face visit in exchange for saving 30 minutes  
22 or less – indicating that even relatively small amounts of time saved may be potentially  
23 appealing to patients.  
24  
25  
26  
27  
28  
29  
30  
31  
32

33 Multivariate logistic regression analyses identified the following characteristics as  
34 independently associated with willingness to visit a videoconferencing centre for specialist  
35 care: living further from a specialist, post-secondary education or greater, and lower burden of  
36 chronic disease. Interest in using email to interact with a specialist was independently  
37 associated with age 40-64 years (vs older), white ethnicity, having an internet connection at  
38 home, and having post-secondary education. Interest in using text messaging to interact with  
39 a specialist was significantly associated with younger age, owning a mobile phone, having an  
40 internet connection at home, having post-secondary education, and having higher income  
41 (Table 3).  
42  
43  
44  
45  
46  
47  
48  
49

## 50 Discussion

51  
52 New information technologies such as videoconferencing, email support and SMS messaging  
53 have the potential to improve chronic disease care. Although there appears to be interest  
54 among providers in adopting these technologies,<sup>6,14,15</sup> the extent of interest among patients is  
55 less well described, and in particular among older adults with chronic disease. In this large  
56  
57  
58  
59  
60



1  
2 survey of community-dwelling western Canadians with chronic disease, we assessed patient  
3 self-reported interest in adopting these three types of information technology, focusing on  
4 their impact on interactions with specialist medical care.  
5  
6  
7

8  
9 There was substantial interest in using information technology for chronic disease care  
10 among respondents residing close to and further from specialists. Although younger and more  
11 educated respondents were more interested in information technology, a majority of  
12 respondents expressed interest in and capacity to use information technology regardless of  
13 age and educational status. The high level of patient interest in these technologies suggests  
14 the need for further research into the potential benefits of information technology to reduce  
15 geographic barriers to chronic disease care – especially since only 1% of respondents had  
16 used these technologies in the year before the survey. Although our survey focused on  
17 interactions with specialist care, it appears that videoconference visits with primary care  
18 physicians may also be of interest to patients.  
19  
20  
21  
22  
23  
24  
25  
26  
27

28  
29 There was consistently greater interest in use of videoconferencing and email than use of  
30 SMS. Because availability of all three technologies is relatively high, it is possible that fewer  
31 respondents were interested in SMS messaging because it is less familiar to them than the  
32 other two technologies -- or alternatively because they feel constrained by the short length of  
33 SMS messages (maximum 160 characters). However, of the three technologies considered in  
34 the current study, least is known about potential barriers to use of SMS messaging<sup>16</sup> and so  
35 this suggestion is speculative.  
36  
37  
38  
39  
40  
41  
42

43 Several systematic reviews have suggested that different types of electronic interventions can  
44 improve process-based or clinical outcomes. These include remote monitoring for chronic  
45 heart failure;<sup>17</sup> home telemonitoring of respiratory conditions;<sup>18</sup> web and computer based  
46 smoking cessation programs;<sup>19</sup> telehealth approaches for secondary prevention of coronary  
47 heart disease;<sup>20</sup> telepsychiatry;<sup>21</sup> virtual reality exposure therapy for anxiety disorders;<sup>22</sup> home  
48 telehealth for diabetes, heart disease and chronic obstructive pulmonary disease.<sup>23</sup> On the  
49 basis of these studies, several countries including Scotland, Denmark, Spain and the United  
50 States have already initiated large scale telehealth programs.<sup>24</sup> There are less data on the  
51 clinical benefits of email and SMS-based information technology programs for management of  
52  
53  
54  
55  
56  
57  
58  
59  
60



1  
2 chronic disease, although physicians appear potentially interested in adopting such  
3 technologies into available management strategies.<sup>6,14,15</sup>  
4  
5  
6

7  
8 Despite this interest among providers and decision-makers, few studies have addressed the  
9 problem of patients' willingness to use electronic technologies for management of chronic  
10 disease. In a 1997 telephone survey of 461 non-institutionalized U.S adults, only one third of  
11 the respondents had heard of telehealth and nearly two thirds thought patients would find it  
12 less satisfactory than seeing a physician in person.<sup>25</sup> In our survey, the major reported barrier  
13 to uptake of the email or SMS was lack of knowledge, but respondents appeared more  
14 optimistic of the potential merits associated with an electronic encounter: <30% cited a  
15 preference for a face-to-face visit as a major barrier to using email to communicate with a  
16 physician. In our study, few participants cited concerns about cost as a major barrier to use of  
17 SMS. Previous studies suggest that many patients would be willing to pay a small annual fee  
18 for certain online services such as viewing parts of their medical record, messaging with their  
19 physician, medication refills, appointment requests, and billing inquiries.<sup>26</sup> Finally, although  
20 appropriate privacy measures would be mandatory before increasing the use of information  
21 technology in health care communication – concerns about privacy were rarely cited by  
22 participants in our study as a potential barrier.  
23  
24  
25  
26  
27  
28  
29  
30  
31  
32  
33  
34  
35

36 Our study has some limitations that should be considered when interpreting results. First,  
37 although our response rates were relatively high, the sample was drawn from respondents to  
38 the CCHS survey and thus the generalizability of our findings to the general Canadian  
39 population is uncertain. Second, data were from self-report, and relationships with actual  
40 behavior were not examined. Third, we focused on certain important chronic diseases  
41 (hypertension, diabetes, heart disease) and the number of respondents with more than one of  
42 these conditions was small. This limited our ability to examine how disease burden affected  
43 interest in electronic technologies – and means that our findings cannot necessarily be  
44 generalized to patients with other chronic diseases such as cancer or lung disease. Fourth,  
45 our index of residence location was unsophisticated, largely because privacy considerations  
46 precluded us from assessing the precise residence location of each respondent. However,  
47 given the relatively high level of interest in electronic technologies among both urban and  
48 non-urban respondents, this is unlikely to have affected our conclusions. Fifth, although most  
49 patients with hypertension, diabetes or heart disease can be managed in primary care, we  
50  
51  
52  
53  
54  
55  
56  
57  
58  
59  
60

1  
2 considered electronic technologies largely as a means of facilitating specialist care. Future  
3 studies may wish to further address how electronic technologies can be used to enhance  
4 primary care management of chronic diseases. Finally, because of the study design, the  
5 questions included in the survey were quite general in nature. It would have been preferable  
6 to give specific examples of how the information technologies would work, ideally with  
7 reference to a working prototype. For example, specifying that videoconferencing could be  
8 done at home using Skype software and a webcam might be associated with increased  
9 enthusiasm among respondents, as compared to videoconferencing at a nearby health  
10 facility. This limitation should be addressed in future work.  
11  
12  
13  
14  
15  
16  
17  
18  
19

20 In summary, we found that the majority of those with chronic diseases were interested in  
21 using electronic technologies to help manage their chronic disease – especially  
22 videoconference and email-based methods. Although younger patients and those with greater  
23 education were more likely to be interested and able to use such technologies, there was  
24 substantial interest even among those aged  $\geq 75$  years or earning \$25,000 annually. These  
25 findings suggest that videoconferencing and email should be further explored as potential  
26 mechanisms for helping Canadians manage chronic diseases such as hypertension, diabetes  
27 and vascular disease.  
28  
29  
30  
31  
32  
33  
34  
35  
36  
37  
38  
39  
40  
41  
42  
43  
44  
45  
46  
47  
48  
49  
50  
51  
52  
53  
54  
55  
56  
57  
58  
59  
60

**Acknowledgements:**

The writing group for this manuscript consisted of Arash Efteshami Afshar, Rob Weaver, Meng Lin, G. Michael Allan, Paul Ronksley, Claudia Sanmartin, Richard Lewanczuk, Mark Rosenberg, Braden Manns, Brenda Hemmelgarn and Marcello Tonelli.

The full membership list of the Interdisciplinary Chronic Disease Collaboration can be found at [www.icdc.ca](http://www.icdc.ca).

This work was funded by an interdisciplinary team grant to the ICDC from Alberta Innovates-Health Solutions.

Confidential

**Table 1: Characteristics of study participants**

|                                         | Total<br>% (95% CI) † | Reside in close<br>proximity to specialist<br>% (95% CI) † | Reside further from<br>specialist<br>% (95% CI) † | P-value |
|-----------------------------------------|-----------------------|------------------------------------------------------------|---------------------------------------------------|---------|
| <b>Male sex</b>                         | 49.9 (46.0 - 53.8)    | 50.6 (44.2 - 57.0)                                         | 49.2 (45.0 - 53.4)                                | 0.710   |
| <b>Age category</b>                     |                       |                                                            |                                                   | 0.042   |
| 40-64                                   | 48.8 (45.6 - 52.0)    | 50.8 (45.0 - 56.5)                                         | 46.8 (42.5 - 51.1)                                |         |
| 65-74                                   | 26.9 (24.1 - 30.0)    | 22.8 (18.4 - 27.9)                                         | 31.1 (27.3 - 35.1)                                |         |
| 75+                                     | 24.3 (21.7 - 27.1)    | 26.4 (21.7 - 31.8)                                         | 22.2 (19.3 - 25.3)                                |         |
| <b>Education</b>                        |                       |                                                            |                                                   | <0.0001 |
| < High School                           | 21.7 (19.0 - 24.5)    | 15.6 (11.9 - 20.2)                                         | 27.7 (24.3 - 31.4)                                |         |
| High School                             | 17.3 (14.6 - 20.4)    | 16.9 (12.7 - 22.1)                                         | 17.7 (14.5 - 21.5)                                |         |
| Post-secondary                          | 43.2 (39.4 - 47.0)    | 42.5 (36.5 - 48.8)                                         | 43.8 (39.6 - 48.2)                                |         |
| University degree                       | 17.9 (14.7 - 21.5)    | 25.0 (19.3 - 31.7)                                         | 10.7 (8.4 - 13.7)                                 |         |
| <b>Household income:</b>                |                       |                                                            |                                                   | 0.001   |
| <\$25,000                               | 15.2 (12.9 - 17.8)    | 13.0 (9.4 - 17.7)*                                         | 17.5 (14.6 - 20.7)                                |         |
| \$25-39,999                             | 18.5 (15.9 - 21.3)    | 16.3 (12.6 - 20.9)                                         | 20.6 (17.6 - 23.9)                                |         |
| \$40-70,000                             | 28.6 (25.5 - 31.9)    | 25.4 (20.6 - 31.0)                                         | 31.7 (27.7 - 36.0)                                |         |
| >\$70,000                               | 37.8 (33.9 - 41.8)    | 45.3 (38.7 - 52.0)                                         | 30.2 (26.3 - 34.5)                                |         |
| <b>Have prescription drug insurance</b> | 85.9 (82.8 - 88.6)    | 85.8 (80.0 - 90.0)                                         | 86.1 (82.9 - 88.8)                                | 0.907   |
| <b>Marital status</b>                   |                       |                                                            |                                                   | 0.510   |
| Married/Common-law                      | 67.0 (63.2 - 70.6)    | 68.1 (61.8 - 73.8)                                         | 65.8 (62.0 - 69.5)                                |         |
| <b>Place of birth</b>                   |                       |                                                            |                                                   | 0.0003  |
| Born in Canada                          | 76.2 (72.3 - 79.7)    | 69.1 (62.2 - 75.2)                                         | 83.4 (78.9 - 87.0)                                |         |
| <b>Province</b>                         |                       |                                                            |                                                   | 0.0001  |
| Alberta                                 | 31.7 (28.8 - 34.6)    | 35.4 (30.1 - 41.1)                                         | 27.9 (24.4 - 31.6)                                |         |
| Manitoba                                | 13.1 (11.2 - 15.2)    | 16.9 (13.4 - 21.0)                                         | 9.2 (7.2 - 11.8)                                  |         |
| Saskatchewan                            | 10.8 (9.5 - 12.2)     | 8.1 (6.2 - 10.6)                                           | 13.5 (11.2 - 16.2)                                |         |
| British Columbia                        | 44.5 (41.4 - 47.7)    | 39.6 (34.0 - 45.6)                                         | 49.4 (45.3 - 53.5)                                |         |
| <b>Ethnicity</b>                        |                       |                                                            |                                                   | 0.004   |
| White                                   | 87.0 (83.4 - 89.9)    | 82.8 (76.3 - 87.8)                                         | 91.2 (88.2 - 93.5)                                |         |
| <b>Type of Chronic disease</b>          |                       |                                                            |                                                   |         |
| Hypertension                            | 81.9 (78.9 - 84.5)    | 80.7 (75.4 - 85.1)                                         | 83.0 (79.4 - 86.1)                                | 0.449   |
| Diabetes                                | 26.2 (23.7 - 28.9)    | 24.5 (20.1 - 29.5)                                         | 28.0 (24.4 - 31.9)                                | 0.315   |
| Heart disease                           | 21.4 (18.7 - 24.3)    | 19.7 (15.5 - 24.7)                                         | 23.1 (19.5 - 27.1)                                | 0.305   |
| Stroke                                  | 7.9 (6.4 - 9.6)       | 7.0 (4.7 - 10.2)*                                          | 8.8 (6.6 - 11.6)                                  | 0.393   |
| <b>Additional chronic disease</b>       | 63.0 (59.3 - 66.6)    | 62.1 (55.5 - 68.4)                                         | 63.9 (59.5 - 68.1)                                | 0.663   |
| <b>Self-perceived Health</b>            |                       |                                                            |                                                   | 0.054   |
| Excellent/ Very Good / Good             | 77.1 (74.1 - 84.5)    | 80.3 (75.2 - 84.5)                                         | 73.9 (69.9 - 77.5)                                |         |
| <b>Smoking Status</b>                   |                       |                                                            |                                                   | 0.0005  |
| Never                                   | 30.8 (27.0 - 34.9)    | 38.3 (31.8 - 45.2)                                         | 23.2 (19.9 - 26.9)                                |         |
| Occasional/Former                       | 53.0 (48.8 - 57.2)    | 46.8 (40.3 - 53.3)                                         | 59.4 (54.9 - 63.7)                                |         |
| Daily                                   | 16.2 (13.2 - 19.7)    | 15.0 (10.4 - 21.1)*                                        | 17.4 (14.1 - 21.3)                                |         |
| <b>Alcohol use</b>                      |                       |                                                            |                                                   | 0.303   |
| None                                    | 26.0 (22.6 - 29.6)    | 26.9 (21.7 - 32.9)                                         | 25.0 (21.4 - 29.0)                                |         |
| Occasional                              | 19.8 (16.8 - 23.2)    | 17.4 (13.1 - 22.7)                                         | 22.2 (18.4 - 26.7)                                |         |
| Regular                                 | 54.2 (50.2 - 58.2)    | 55.7 (49.2 - 62.0)                                         | 52.8 (48.4 - 57.1)                                |         |
| <b>Body mass index</b>                  |                       |                                                            |                                                   | 0.427   |
| BMI < 30 kg/m <sup>2</sup>              | 69.2 (65.3 - 72.9)    | 70.7 (64.1 - 76.6)                                         | 67.7 (63.6 - 71.6)                                |         |

†All proportions and 95% CI are weighted and bootstrapped as per Statistics Canada guidelines; \*CV=16-33.3%

**Table 2: Capacity and willingness to use information technology**

|                                                                                                                                                                                                                                       | Total<br>% (95% CI) <sup>†</sup> | Reside in close<br>proximity to specialist<br>% (95% CI) <sup>†</sup> | Reside further from<br>specialist<br>% (95% CI) <sup>†</sup> | P-value |
|---------------------------------------------------------------------------------------------------------------------------------------------------------------------------------------------------------------------------------------|----------------------------------|-----------------------------------------------------------------------|--------------------------------------------------------------|---------|
| <b>Own the requisite equipment for email/SMS communication</b>                                                                                                                                                                        |                                  |                                                                       |                                                              |         |
| Own computer with internet                                                                                                                                                                                                            | 76.4 (73.3 - 79.3)               | 80.2 (74.9 - 84.6)                                                    | 72.6 (68.8 - 76.1)                                           | 0.020   |
| Own a cell phone                                                                                                                                                                                                                      | 73.9 (70.7 - 76.8)               | 75.6 (70.4 - 80.2)                                                    | 72.1 (68.0 - 75.9)                                           | 0.292   |
| <b>Willingness to use information technologies</b>                                                                                                                                                                                    |                                  |                                                                       |                                                              |         |
| Using videoconferencing to<br>interact with primary care                                                                                                                                                                              | 50.4 (46.4 - 54.4)               | 47.1 (40.2 - 54.1)                                                    | 53.8 (49.5 - 58.1)                                           | 0.121   |
| Using videoconferencing to<br>interact with specialist                                                                                                                                                                                | 65.1 (61.4 - 68.6)               | 60.1 (53.7 - 66.2)                                                    | 70.2 (66.4 - 73.7)                                           | 0.006   |
| Using email to interact with<br>specialist                                                                                                                                                                                            | 66.3 (63.0 - 69.5)               | 69.0 (62.9 - 74.5)                                                    | 63.5 (59.7 - 67.2)                                           | 0.147   |
| Using SMS to interact with<br>specialist                                                                                                                                                                                              | 44.9 (41.2 - 48.7)               | 46.2 (39.8 - 52.7)                                                    | 43.6 (39.3 - 48.0)                                           | 0.520   |
| <b>Amount of travel time that videoconferencing would need to save respondents in order for them to select it in preference to an in-person visit with a specialist (among respondents who were willing to use videoconferencing)</b> |                                  |                                                                       |                                                              |         |
| <=30 minutes                                                                                                                                                                                                                          | 28.3 (23.9 - 33.0)               | 30.6 (23.1 - 39.4)                                                    | 26.2 (21.5 - 31.5)                                           | 0.038   |
| 31-60 minutes                                                                                                                                                                                                                         | 21.4 (17.2 - 26.4)               | 25.7 (18.2 - 35.0)*                                                   | 17.7 (13.9 - 22.3)                                           |         |
| >60 minutes                                                                                                                                                                                                                           | 41.7 (36.9 - 46.7)               | 34.1 (26.6 - 42.5)                                                    | 48.3 (42.8 - 53.9)                                           |         |
| Don't know                                                                                                                                                                                                                            | 8.6 (6.5 - 11.4)                 | 9.6 (5.9 - 15.1)*                                                     | 7.8 (5.5 - 10.9)*                                            |         |

<sup>†</sup>All proportions and 95% CI are weighted and bootstrapped as per Statistics Canada guidelines; \*CV=16-33.3%

Respondents with a relevant medical specialist in the same metropolitan area as their home were considered to reside "in close proximity" to such specialists; other participants were considered to reside "further" from specialists.

Table 3: Factors associated with willingness to use information technology, after adjustment for potential confounders

|                                | Interest in video-conferencing % (95% CI) † | Adjusted OR (95% CI) † | Interest in email % (95% CI) † | Adjusted OR (95% CI) †      | Interest in SMS % (95% CI) † | Adjusted OR (95% CI) † |
|--------------------------------|---------------------------------------------|------------------------|--------------------------------|-----------------------------|------------------------------|------------------------|
| <b>Residence location</b>      |                                             |                        |                                |                             |                              |                        |
| Reside close to specialist     | 60.1 (53.7 - 66.2)                          | Ref                    | 69.0 (62.9 - 74.5)             | Ref                         | 46.2 (39.8 - 52.7)           | Ref                    |
| Reside further from specialist | 70.2 (66.4 - 73.7)                          | 2.00 (1.37 - 2.90)     | 63.5 (59.7 - 67.2)             | 1.08 (0.66 - 1.74)          | 43.6 (39.3 - 48.0)           | 1.21 (0.82 - 1.76)     |
| <b>Own internet</b>            |                                             |                        |                                |                             |                              |                        |
| No                             | 52.0 (44.8 - 59.1)                          | Ref                    | 16.4 (12.6 - 21.2)             | Ref                         | 23.0 (18.3 - 28.5)           | Ref                    |
| Yes                            | 69.2 (64.9 - 73.3)                          | 1.40 (0.85 - 2.31)     | 81.7 (78.1 - 84.9)             | 12.76 (7.43 - 21.90)        | 52.7 (47.2 - 56.1)           | 2.05 (1.30 - 3.22)     |
| <b>Own cell phone</b>          |                                             |                        |                                |                             |                              |                        |
| No                             | 57.5 (50.6 - 64.2)                          | Ref                    | 48.7 (41.9 - 55.6)             | Ref                         | 27.3 (22.4 - 32.8)           | Ref                    |
| Yes                            | 68.4 (64.1 - 72.4)                          | 1.10 (0.76 - 1.62)     | 72.3 (68.5 - 75.9)             | 0.92 (0.57 - 1.49)          | 52.6 (46.9 - 56.2)           | 1.60 (1.08 - 2.37)     |
| <b>Sex</b>                     |                                             |                        |                                |                             |                              |                        |
| Male                           | 66.1 (60.7 - 71.2)                          | Ref                    | 69.6 (64.5 - 74.4)             | Ref                         | 49.1 (43.5 - 54.9)           | Ref                    |
| Female                         | 64.0 (58.8 - 68.9)                          | 1.00 (0.68 - 1.47)     | 63.0 (58.1 - 67.6)             | 0.92 (0.56 - 1.50)          | 40.6 (35.5 - 46.0)           | 0.87 (0.60 - 1.25)     |
| <b>Age</b>                     |                                             |                        |                                |                             |                              |                        |
| 40-64                          | 70.3 (64.6 - 75.4)                          | Ref                    | 80.1 (75.2 - 84.2)             | Ref                         | 55.8 (49.6 - 61.8)           | Ref                    |
| 65-74                          | 64.5 (57.7 - 70.8)                          | 0.83 (0.54 - 1.28)     | 64.4 (57.8 - 70.4)             | 0.75 (0.44 - 1.28)          | 41.2 (34.6 - 48.1)           | 0.81 (0.53 - 1.23)     |
| 75+                            | 55.3 (48.5 - 61.9)                          | 0.81 (0.50 - 1.32)     | 40.7 (34.3 - 47.5)             | 0.46 (0.25 - 0.81)          | 26.9 (21.8 - 32.5)           | 0.61 (0.38 - 0.99)     |
| <b>Education</b>               |                                             |                        |                                |                             |                              |                        |
| < High School                  | 49.8 (43.3 - 56.3)                          | Ref                    | 38.0 (31.7 - 44.7)             | Ref                         | 28.6 (23.1 - 34.8)           | Ref                    |
| High School                    | 61.8 (52.3 - 70.4)                          | 1.39 (0.83 - 2.30)     | 68.8 (59.6 - 76.7)             | 1.74 (0.96 - 3.16)          | 44.2 (34.8 - 54.1)           | 1.37 (0.81 - 2.31)     |
| Post-secondary                 | 68.2 (62.1 - 73.8)                          | 2.05 (1.28 - 3.26)     | 70.5 (64.9 - 75.5)             | 1.60 (0.97 - 2.63)          | 46.6 (40.7 - 52.6)           | 1.33 (0.85 - 2.08)     |
| University degree              | 79.0 (71.5 - 84.9)                          | 3.89 (2.07 - 7.31)     | 89.1 (82.5 - 93.5)             | 4.41 (1.98 - 9.81)          | 62.4 (51.5 - 72.1)           | 2.31 (1.22 - 4.37)     |
| <b>Household income</b>        |                                             |                        |                                |                             |                              |                        |
| <\$25,000                      | 55.3 (45.9 - 64.4)                          | Ref                    | 41.0 (32.4 - 50.1)             | Ref                         | 26.4 (20.0 - 34.1)           | Ref                    |
| \$25-39,999                    | 60.6 (52.3 - 68.4)                          | 1.05 (0.56 - 1.97)     | 50.1 (42.3 - 57.9)             | 0.92 (0.49 - 1.75)          | 29.7 (23.4 - 36.8)           | 1.09 (0.61 - 1.94)     |
| \$40-70,000                    | 70.2 (64.1 - 75.6)                          | 1.12 (0.59 - 2.15)     | 69.8 (63.7 - 75.3)             | 1.38 (0.75 - 2.55)          | 45.3 (38.8 - 52.0)           | 1.49 (0.84 - 2.67)     |
| >\$70,000                      | 67.2 (59.8 - 73.9)                          | 0.71 (0.34 - 1.47)     | 81.4 (74.9 - 86.6)             | 1.35 (0.64 - 2.87)          | 59.4 (52.0 - 66.4)           | 2.05 (1.11 - 3.77)     |
| <b>Drug insurance status</b>   |                                             |                        |                                |                             |                              |                        |
| No                             | 67.1 (58.0 - 75.1)                          | Ref                    | 68.2 (59.6 - 75.7)             | Ref                         | 40.4 (30.1 - 51.7)           | Ref                    |
| Yes                            | 64.8 (60.7 - 68.6)                          | 0.79 (0.48 - 1.28)     | 66.0 (62.2 - 69.5)             | 0.72 (0.42 - 1.22)          | 45.7 (41.6 - 49.8)           | 1.15 (0.70 - 1.87)     |
| <b>Marital status</b>          |                                             |                        |                                |                             |                              |                        |
| Married/Common law             | 66.1 (61.1 - 70.7)                          | Ref                    | 72.3 (68.2 - 76.1)             | Ref                         | 47.4 (42.5 - 52.2)           | Ref                    |
| Widowed/Sep/Div/Single         | 62.9 (57.4 - 68.1)                          | 0.96 (0.64 - 1.46)     | 54.0 (47.8 - 60.0)             | 0.85 (0.54 - 1.36)          | 40.1 (34.1 - 46.4)           | 1.33 (0.88 - 1.99)     |
| <b>Place of birth</b>          |                                             |                        |                                |                             |                              |                        |
| Born in Canada                 | 66.5 (62.6 - 70.2)                          | Ref                    | 67.1 (63.6 - 70.5)             | Ref                         | 47.9 (43.5 - 52.3)           | Ref                    |
| Born outside Canada            | 60.4 (50.4 - 69.7)                          | 0.84 (0.51 - 1.38)     | 63.4 (53.9 - 72.0)             | 1.32 (0.74 - 2.36)          | 35.3 (26.8 - 44.9)           | 0.80 (0.47 - 1.35)     |
| <b>Province</b>                |                                             |                        |                                |                             |                              |                        |
| Alberta                        | 69.1 (62.0 - 75.4)                          | Ref                    | 70.4 (64.6 - 75.5)             | Ref                         | 47.7 (40.8 - 54.7)           | Ref                    |
| Manitoba                       | 57.0 (45.6 - 67.7)                          | 0.60 (0.31 - 1.16)     | 49.7 (39.1 - 60.3)             | 0.43 (0.19 - 0.97); P=0.042 | 48.6 (37.2 - 59.9)           | 1.23 (0.68 - 2.23)     |
| Saskatchewan                   | 59.4 (50.9 - 67.4)                          | 0.62 (0.36 - 1.08)     | 62.7 (54.4 - 70.4)             | 0.87 (0.50 - 1.52)          | 44.0 (35.7 - 52.7)           | 0.87 (0.53 - 1.43)     |
| British Columbia               | 66.0 (60.1 - 71.4)                          | 0.84 (0.51 - 1.38)     | 69.2 (63.4 - 74.4)             | 0.77 (0.44 - 1.36)          | 42.1 (36.1 - 48.3)           | 0.79 (0.51 - 1.23)     |

|                                   | Interest in video-conferencing % (95% CI) † | Adjusted OR (95% CI) † | Interest in email % (95% CI) † | Adjusted OR (95% CI) †      | Interest in SMS % (95% CI) † | Adjusted OR (95% CI) † |
|-----------------------------------|---------------------------------------------|------------------------|--------------------------------|-----------------------------|------------------------------|------------------------|
| <b>Ethnicity</b>                  |                                             |                        |                                |                             |                              |                        |
| White                             | 65.3 (61.5 - 68.9)                          | Ref                    | 68.6 (65.3 - 71.8)             | Ref                         | 45.9 (41.9 - 50.0)           | Ref                    |
| Aboriginal/Other                  | 63.7 (50.6 - 75.0)                          | 1.28 (0.68 - 2.43)     | 50.5 (36.3 - 64.6)             | 0.32 (0.13 - 0.76); P=0.010 | 38.1 (25.6 - 52.4)*          | 0.71 (0.36 - 1.40)     |
| <b>Type of chronic disease**</b>  |                                             |                        |                                |                             |                              |                        |
| <b>Hypertension</b>               |                                             |                        |                                |                             |                              |                        |
| No                                | 63.8 (54.6 - 72.1)                          | Ref                    | 66.4 (57.2 - 74.6)             | Ref                         | 43.7 (34.3 - 53.6)           | Ref                    |
| Yes                               | 65.4 (61.5 - 69.1)                          | 0.87 (0.52 - 1.45)     | 66.3 (62.6 - 69.8)             | 0.75 (0.42 - 1.31)          | 45.2 (41.0 - 49.4)           | 1.14 (0.69 - 1.89)     |
| <b>Diabetes</b>                   |                                             |                        |                                |                             |                              |                        |
| No                                | 66.2 (61.8 - 70.4)                          | Ref                    | 68.0 (64.0 - 71.8)             | Ref                         | 45.1 (40.6 - 49.6)           | Ref                    |
| Yes                               | 61.9 (55.3 - 68.0)                          | 0.83 (0.55 - 1.24)     | 61.4 (54.8 - 67.7)             | 0.84 (0.47 - 1.49)          | 44.5 (37.5 - 51.7)           | 1.20 (0.82 - 1.77)     |
| <b>Heart disease</b>              |                                             |                        |                                |                             |                              |                        |
| No                                | 66.9 (62.8 - 70.7)                          | Ref                    | 68.5 (64.7 - 72.0)             | Ref                         | 44.8 (40.5 - 49.1)           | Ref                    |
| Yes                               | 58.3 (49.9 - 66.2)                          | 0.73 (0.46 - 1.17)     | 58.3 (50.8 - 65.5)             | 0.82 (0.47 - 1.43)          | 45.5 (38.0 - 53.1)           | 1.41 (0.94 - 2.10)     |
| <b>Stroke</b>                     |                                             |                        |                                |                             |                              |                        |
| No                                | 66.7 (62.9 - 70.3)                          | Ref                    | 68.2 (64.8 - 71.4)             | Ref                         | 46.4 (42.4 - 50.4)           | Ref                    |
| Yes                               | 46.0 (33.2 - 59.3)                          | 0.55 (0.28 - 1.07)     | 43.9 (31.7 - 57.0)             | 0.73 (0.37 - 1.45)          | 28.0 (18.6 - 39.8)*          | 0.73 (0.40 - 1.35)     |
| <b>Additional chronic disease</b> |                                             |                        |                                |                             |                              |                        |
| No                                | 75.4 (70.7 - 79.6)                          | Ref                    | 75.3 (70.1 - 79.8)             | Ref                         | 50.2 (43.8 - 56.5)           | Ref                    |
| Yes                               | 59.0 (54.0 - 63.8)                          | 0.56 (0.38 - 0.83)     | 61.0 (56.7 - 65.2)             | 0.74 (0.46 - 1.17)          | 41.8 (36.8 - 47.0)           | 0.92 (0.62 - 1.36)     |
| <b>Self-perceived health</b>      |                                             |                        |                                |                             |                              |                        |
| Excellent/ Very Good / Good       | 68.1 (64.0 - 72.0)                          | Ref                    | 69.9 (66.1 - 73.5)             | Ref                         | 46.1 (41.9 - 50.5)           | Ref                    |
| Fair/Poor                         | 54.8 (47.4 - 61.9)                          | 0.79 (0.52 - 1.19)     | 53.8 (46.4 - 61.0)             | 0.85 (0.49 - 1.46)          | 40.9 (33.2 - 49.1)           | 1.12 (0.70 - 1.77)     |

†All proportions and 95% CI are weighted and bootstrapped as per Statistics Canada guidelines; \*CV=16-33.3%

Models were adjusted by resident location, barrier to specialist, own internet at home, own a cell phone, gender, age, education, household income, insurance status, marital status, place of birth, province, ethnicity, type of chronic disease, additional chronic disease, and self-perceived health.

\*\* Conditional OR for patients who had at least one of the four chronic diseases

Sep = separated, div=divorced, OR=Odds Ratio; CI= confidence interval



1  
2  
3  
4  
5  
6  
7  
8  
9  
10  
11  
12  
13  
14  
15  
16  
17  
18  
19  
20  
21  
22  
23  
24  
25  
26  
27  
28  
29  
30  
31  
32  
33  
34  
35  
36  
37  
38  
39  
40  
41  
42  
43  
44  
45  
46  
47  
48  
49  
50  
51  
52  
53  
54  
55  
56  
57  
58  
59  
60

Figure 1: Reasons provided for lack of willingness to use email and SMS

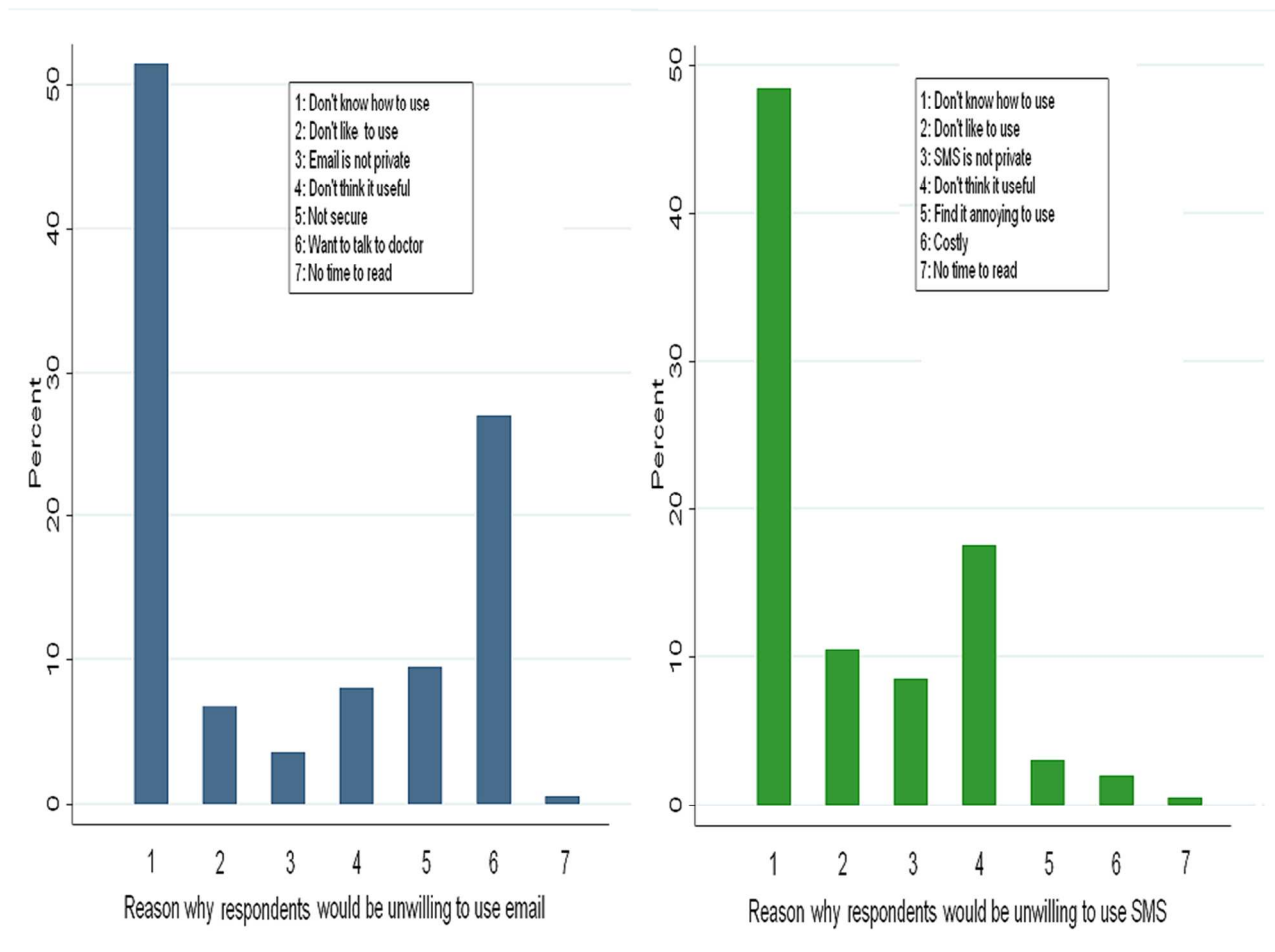

## References:

1. Murray CJ, Vos T, Lozano R, et al. Disability-adjusted life years (DALYs) for 291 diseases and injuries in 21 regions, 1990-2010: a systematic analysis for the Global Burden of Disease Study 2010. *Lancet*. 2012;380:2197-223.
2. Rucker D, Hemmelgarn BR, Lin M, et al. Quality of care and mortality are worse in chronic kidney disease patients living in remote areas. *Kidney international*. 2011;79:210-7.
3. Tonelli M, Hemmelgarn B, Kim AK, et al. Association between residence location and likelihood of kidney transplantation in Aboriginal patients treated with dialysis in Canada. *Kidney international*. 2006;70:924-30.
4. Sittig DF, King S, Hazlehurst BL. A survey of patient-provider e-mail communication: what do patients think? *International journal of medical informatics*. 2001;61:71-80.
5. Virji A, Yarnall KS, Krause KM, et al. Use of email in a family practice setting: opportunities and challenges in patient- and physician-initiated communication. *BMC medicine*. 2006;4:18.
6. Katz SJ, Nissan N, Moyer CA. Crossing the digital divide: evaluating online communication between patients and their providers. *The American journal of managed care*. 2004;10:593-8.
7. Canada Health Infoway PIIGI. Telehealth benefits and adoption connecting people and providers across Canada. 2011; <http://site.ebrary.com/id/10491195>.
8. Public Health Agency of Canada. Chronic Disease Risk Factors. 2013; [http://www.phac-aspc.gc.ca/cd-mc/risk\\_factors-facteurs\\_risque-eng.php](http://www.phac-aspc.gc.ca/cd-mc/risk_factors-facteurs_risque-eng.php). Accessed September 5, 2013.
9. Statistics Canada. Table358-0153 - Canadian Internet use survey, Internet use, by age group and Internet activity, occasional (percent),. 2013; <http://www5.statcan.gc.ca/cansim/a26?lang=eng&retrLang=eng&id=3580153&pattern=internet&tabMode=dataTable&srchLan=-1&p1=1&p2=50>. Accessed September 5, 2011.
10. Statistics Canada. Table358-0167 - Canadian Internet use survey, household access to the Internet at home, by household income quartile, Canada and provinces, occasional (percent). 2013; <http://www5.statcan.gc.ca/cansim/a26?lang=eng&retrLang=eng&id=3580167&pattern=internet&tabMode=dataTable&srchLan=-1&p1=1&p2=50>. Accessed September 5, 2013.
11. Shields M, Connor Gorber S, Janssen I, Tremblay MS. Bias in self-reported estimates of obesity in Canadian health surveys: an update on correction equations for adults. *Health reports / Statistics Canada, Canadian Centre for Health Information = Rapports sur la sante / Statistique Canada, Centre canadien d'information sur la sante*. 2011;22:35-45.
12. Aday LA, Andersen R. A framework for the study of access to medical care. *Health services research*. 1974;9:208-20.
13. Werner P, Karnieli E. A model of the willingness to use telemedicine for routine and specialized care. *J Telemed Telecare*. 2003;9:264-72.
14. Larcher B, Arisi E, Berloff F, et al. Analysis of user-satisfaction with the use of a teleconsultation system in oncology. *Medical informatics and the Internet in medicine*. 2003;28:73-84.
15. Cloutier P, Cappelli M, Glennie JE, Keresztes C. Mental health services for children and youth: a survey of physicians' knowledge, attitudes and use of telehealth services. *J Telemed Telecare*. 2008;14:98-101.
16. Jimison H, Gorman P, Woods S, et al. Barriers and drivers of health information technology use for the elderly, chronically ill, and underserved. *Evidence report/technology assessment*. 2008:1-1422.
17. Clark RA, Inglis SC, McAlister FA, Cleland JG, Stewart S. Telemonitoring or structured telephone support programmes for patients with chronic heart failure: systematic review and meta-analysis. *Bmj*. 2007;334:942.
18. Jaana M, Pare G, Sicotte C. Home telemonitoring for respiratory conditions: a systematic review. *The American journal of managed care*. 2009;15:313-20.
19. Myung SK, McDonnell DD, Kazinets G, Seo HG, Moskowitz JM. Effects of Web- and computer-based smoking cessation programs: meta-analysis of randomized controlled trials. *Archives of internal medicine*. 2009;169:929-37.
20. Neubeck L, Redfern J, Fernandez R, Briffa T, Bauman A, Freedman SB. Telehealth interventions for the secondary prevention of coronary heart disease: a systematic review. *European journal of cardiovascular prevention and rehabilitation : official journal of the European Society of Cardiology, Working Groups on Epidemiology & Prevention and Cardiac Rehabilitation and Exercise Physiology*. 2009;16:281-9.
21. Loane M, Wootton R. A review of guidelines and standards for telemedicine. *J Telemed Telecare*. 2002;8:63-71.
22. Opris D, Pinte S, Garcia-Palacios A, Botella C, Szamoskozi S, David D. Virtual reality exposure therapy in anxiety disorders: a quantitative meta-analysis. *Depression and anxiety*. 2012;29:85-93.
23. Polisen J, Tran K, Cimon K, et al. Home telehealth for chronic obstructive pulmonary disease: a systematic review and meta-analysis. *J Telemed Telecare*. 2010;16:120-7.
24. Cruickshank J. *Healthcare without walls : a framework for delivering telehealth at scale*. London: 2020health.org; 2010.

- 1  
2  
3  
4  
5  
6  
7  
8  
9  
10  
11  
12  
13  
14
25. Brick JE, Bashshur RL, Brick JF, D'Alessandri RM. Public knowledge, perception, and expressed choice of telemedicine in rural West Virginia. *Telemedicine journal : the official journal of the American Telemedicine Association*. 1997;3:159-71.
26. Adler KG. Web portals in primary care: an evaluation of patient readiness and willingness to pay for online services. *Journal of medical Internet research*. 2006;8:e26.

15  
16  
17  
18  
19  
20  
21  
22  
23  
24  
25  
26  
27  
28  
29  
30  
31  
32  
33  
34  
35  
36  
37  
38  
39  
40  
41  
42  
43  
44  
45  
46  
47  
48  
49  
50  
51  
52  
53  
54  
55  
56  
57  
58  
59  
60

**Supplementary table 1: Reasons why respondents would be unwilling to use email/SMS**

| Unwilling to use email      | Total % (95% CI) <sup>†</sup> | Unwilling to use SMS      | Total % (95% CI) <sup>†</sup> |
|-----------------------------|-------------------------------|---------------------------|-------------------------------|
| Don't know how to use email | 51.5 (45.7 - 57.2)            | Don't know how to use SMS | 48.4 (43.4 - 53.5)            |
| Don't like to use email     | 6.3 (3.6 - 10.8)*             | Don't like to use SMS     | 10.5 (7.5 - 14.6)*            |
| Email is not private        | 3.5 (1.9 - 6.2)*              | SMS is not private        | 8.5 (5.9 - 11.9)*             |
| Don't think email useful    | 8.0 (5.4 - 11.7)*             | Don't think SMS useful    | 17.5 (13.5 - 22.3)            |
| Not secure                  | 9.5 (5.7 - 15.6)*             | Find SMS annoying to use  | 3.0 (1.9 - 4.9)*              |
| Want to talk to doctor      | 27.0 (22.1 - 32.6)            | Costly                    | 2.0 (0.7 - 5.8)**             |
| No time to read email       | 0.5 (0.1 - 1.1)**             | No time to read SMS       | 0.5 (0.2 - 1.2)**             |

†All proportions and 95% CI are weighted and bootstrapped as per Statistics Canada guidelines; \*CV=16-33.3%; \*\* CV>33.3%

## STROBE Statement—checklist of items that should be included in reports of observational studies

|                              | Item No | Recommendation                                                                                                                                                                                                                                                                                                                                                                                                                                                                                                                                                                                                                                                                                   |
|------------------------------|---------|--------------------------------------------------------------------------------------------------------------------------------------------------------------------------------------------------------------------------------------------------------------------------------------------------------------------------------------------------------------------------------------------------------------------------------------------------------------------------------------------------------------------------------------------------------------------------------------------------------------------------------------------------------------------------------------------------|
| <b>Title and abstract</b>    | 1       | (a) Indicate the study's design with a commonly used term in the title or the abstract<br>(b) Provide in the abstract an informative and balanced summary of what was done and what was found                                                                                                                                                                                                                                                                                                                                                                                                                                                                                                    |
| <b>Introduction</b>          |         |                                                                                                                                                                                                                                                                                                                                                                                                                                                                                                                                                                                                                                                                                                  |
| Background/rationale         | 2       | Explain the scientific background and rationale for the investigation being reported                                                                                                                                                                                                                                                                                                                                                                                                                                                                                                                                                                                                             |
| Objectives                   | 3       | State specific objectives, including any prespecified hypotheses                                                                                                                                                                                                                                                                                                                                                                                                                                                                                                                                                                                                                                 |
| <b>Methods</b>               |         |                                                                                                                                                                                                                                                                                                                                                                                                                                                                                                                                                                                                                                                                                                  |
| Study design                 | 4       | Present key elements of study design early in the paper                                                                                                                                                                                                                                                                                                                                                                                                                                                                                                                                                                                                                                          |
| Setting                      | 5       | Describe the setting, locations, and relevant dates, including periods of recruitment, exposure, follow-up, and data collection                                                                                                                                                                                                                                                                                                                                                                                                                                                                                                                                                                  |
| Participants                 | 6       | (a) <i>Cohort study</i> —Give the eligibility criteria, and the sources and methods of selection of participants. Describe methods of follow-up<br><i>Case-control study</i> —Give the eligibility criteria, and the sources and methods of case ascertainment and control selection. Give the rationale for the choice of cases and controls<br><i>Cross-sectional study</i> —Give the eligibility criteria, and the sources and methods of selection of participants<br>(b) <i>Cohort study</i> —For matched studies, give matching criteria and number of exposed and unexposed<br><i>Case-control study</i> —For matched studies, give matching criteria and the number of controls per case |
| Variables                    | 7       | Clearly define all outcomes, exposures, predictors, potential confounders, and effect modifiers. Give diagnostic criteria, if applicable                                                                                                                                                                                                                                                                                                                                                                                                                                                                                                                                                         |
| Data sources/<br>measurement | 8*      | For each variable of interest, give sources of data and details of methods of assessment (measurement). Describe comparability of assessment methods if there is more than one group                                                                                                                                                                                                                                                                                                                                                                                                                                                                                                             |
| Bias                         | 9       | Describe any efforts to address potential sources of bias                                                                                                                                                                                                                                                                                                                                                                                                                                                                                                                                                                                                                                        |
| Study size                   | 10      | Explain how the study size was arrived at                                                                                                                                                                                                                                                                                                                                                                                                                                                                                                                                                                                                                                                        |
| Quantitative variables       | 11      | Explain how quantitative variables were handled in the analyses. If applicable, describe which groupings were chosen and why                                                                                                                                                                                                                                                                                                                                                                                                                                                                                                                                                                     |
| Statistical methods          | 12      | (a) Describe all statistical methods, including those used to control for confounding<br>(b) Describe any methods used to examine subgroups and interactions<br>(c) Explain how missing data were addressed<br>(d) <i>Cohort study</i> —If applicable, explain how loss to follow-up was addressed<br><i>Case-control study</i> —If applicable, explain how matching of cases and controls was addressed<br><i>Cross-sectional study</i> —If applicable, describe analytical methods taking account of sampling strategy<br>(e) Describe any sensitivity analyses                                                                                                                                |

Continued on next page

1  
2  
3  
4  
5  
6  
7  
8  
9  
10  
11  
12  
13  
14  
15  
16  
17  
18  
19  
20  
21  
22  
23  
24  
25  
26  
27  
28  
29  
30  
31  
32  
33  
34  
35  
36  
37  
38  
39  
40  
41  
42  
43  
44  
45  
46  
47  
48  
49  
50  
51  
52  
53  
54  
55  
56  
57  
58  
59  
60**Results**

|                  |     |                                                                                                                                                                                                                                                                                                                                                                                                               |
|------------------|-----|---------------------------------------------------------------------------------------------------------------------------------------------------------------------------------------------------------------------------------------------------------------------------------------------------------------------------------------------------------------------------------------------------------------|
| Participants     | 13* | (a) Report numbers of individuals at each stage of study—eg numbers potentially eligible, examined for eligibility, confirmed eligible, included in the study, completing follow-up, and analysed<br>(b) Give reasons for non-participation at each stage<br>(c) Consider use of a flow diagram                                                                                                               |
| Descriptive data | 14* | (a) Give characteristics of study participants (eg demographic, clinical, social) and information on exposures and potential confounders<br>(b) Indicate number of participants with missing data for each variable of interest<br>(c) <i>Cohort study</i> —Summarise follow-up time (eg, average and total amount)                                                                                           |
| Outcome data     | 15* | <i>Cohort study</i> —Report numbers of outcome events or summary measures over time<br><i>Case-control study</i> —Report numbers in each exposure category, or summary measures of exposure<br><i>Cross-sectional study</i> —Report numbers of outcome events or summary measures                                                                                                                             |
| Main results     | 16  | (a) Give unadjusted estimates and, if applicable, confounder-adjusted estimates and their precision (eg, 95% confidence interval). Make clear which confounders were adjusted for and why they were included<br>(b) Report category boundaries when continuous variables were categorized<br>(c) If relevant, consider translating estimates of relative risk into absolute risk for a meaningful time period |
| Other analyses   | 17  | Report other analyses done—eg analyses of subgroups and interactions, and sensitivity analyses                                                                                                                                                                                                                                                                                                                |

**Discussion**

|                  |    |                                                                                                                                                                            |
|------------------|----|----------------------------------------------------------------------------------------------------------------------------------------------------------------------------|
| Key results      | 18 | Summarise key results with reference to study objectives                                                                                                                   |
| Limitations      | 19 | Discuss limitations of the study, taking into account sources of potential bias or imprecision. Discuss both direction and magnitude of any potential bias                 |
| Interpretation   | 20 | Give a cautious overall interpretation of results considering objectives, limitations, multiplicity of analyses, results from similar studies, and other relevant evidence |
| Generalisability | 21 | Discuss the generalisability (external validity) of the study results                                                                                                      |

**Other information**

|         |    |                                                                                                                                                               |
|---------|----|---------------------------------------------------------------------------------------------------------------------------------------------------------------|
| Funding | 22 | Give the source of funding and the role of the funders for the present study and, if applicable, for the original study on which the present article is based |
|---------|----|---------------------------------------------------------------------------------------------------------------------------------------------------------------|

\*Give information separately for cases and controls in case-control studies and, if applicable, for exposed and unexposed groups in cohort and cross-sectional studies.

**Note:** An Explanation and Elaboration article discusses each checklist item and gives methodological background and published examples of transparent reporting. The STROBE checklist is best used in conjunction with this article (freely available on the Web sites of PLoS Medicine at <http://www.plosmedicine.org/>, Annals of Internal Medicine at <http://www.annals.org/>, and Epidemiology at <http://www.epidem.com/>). Information on the STROBE Initiative is available at [www.strobe-statement.org](http://www.strobe-statement.org).
